# Supplementary material
Source: HighWire-hosted journal article supplement (https://bmjopenquality.bmj.com/highwire/filestream/135978/field_highwire_adjunct_files/0/ds3108.docx)

Table 1: Proportion of patients, known to the four specialist palliative care teams in Lothian, with electronic information available to Out-of-Hours services.

| **Audit year** | **Total number of patients registered** | **Number of patients with information available to OOH (%)** | **Number with SN only (%)** | **Number with ePCS only (%)** | **Number with both SN and ePCS (%)** |
| --- | --- | --- | --- | --- | --- |
| **2008** | 377 | 189 (49%) | 189 (49%) | - | - |
| **2012** | 346 | 260 (75%) | 75 (22%) | 93 (27%) | 92 (26%) |
| **2013** | 422 | 300 (71%) | 71 (17%) | 99 (23%) | 130 (31%) |

SN – Special note, ePCS – electronic palliative care summaries, OOH – Out of hours


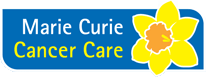

Supplement: ds3108.docx [file ds3108.docx]
